# Supplementary material for: Anion influence on transformations of a nonporous 3D to porous 3D coordination polymer
Source: Royal Society of Chemistry journal article supplement (doi:10.1039/c4nj00175c), 2014-01-01
Supplement: c4nj00175c1.pdf [file c4nj00175c1.pdf]

**Electronic Supplementary Information for MS:**

**Anion influence on transformations of nonporous 3D to porous  
3D coordination polymer**

Lida Hashemi<sup>a</sup>, Ali Morsali<sup>a\*</sup>, Orhan Büyükgüngör<sup>b</sup>

<sup>a</sup>Department of Chemistry, Faculty of Sciences, Tarbiat Modares University, P.O. Box  
14117-13116, Tehran, Islamic Republic of Iran

<sup>b</sup>Department of Physics, Faculty of Arts and Sciences, OndokuzMayis University,  
55139 Kurupelit, Samsun, Turkey

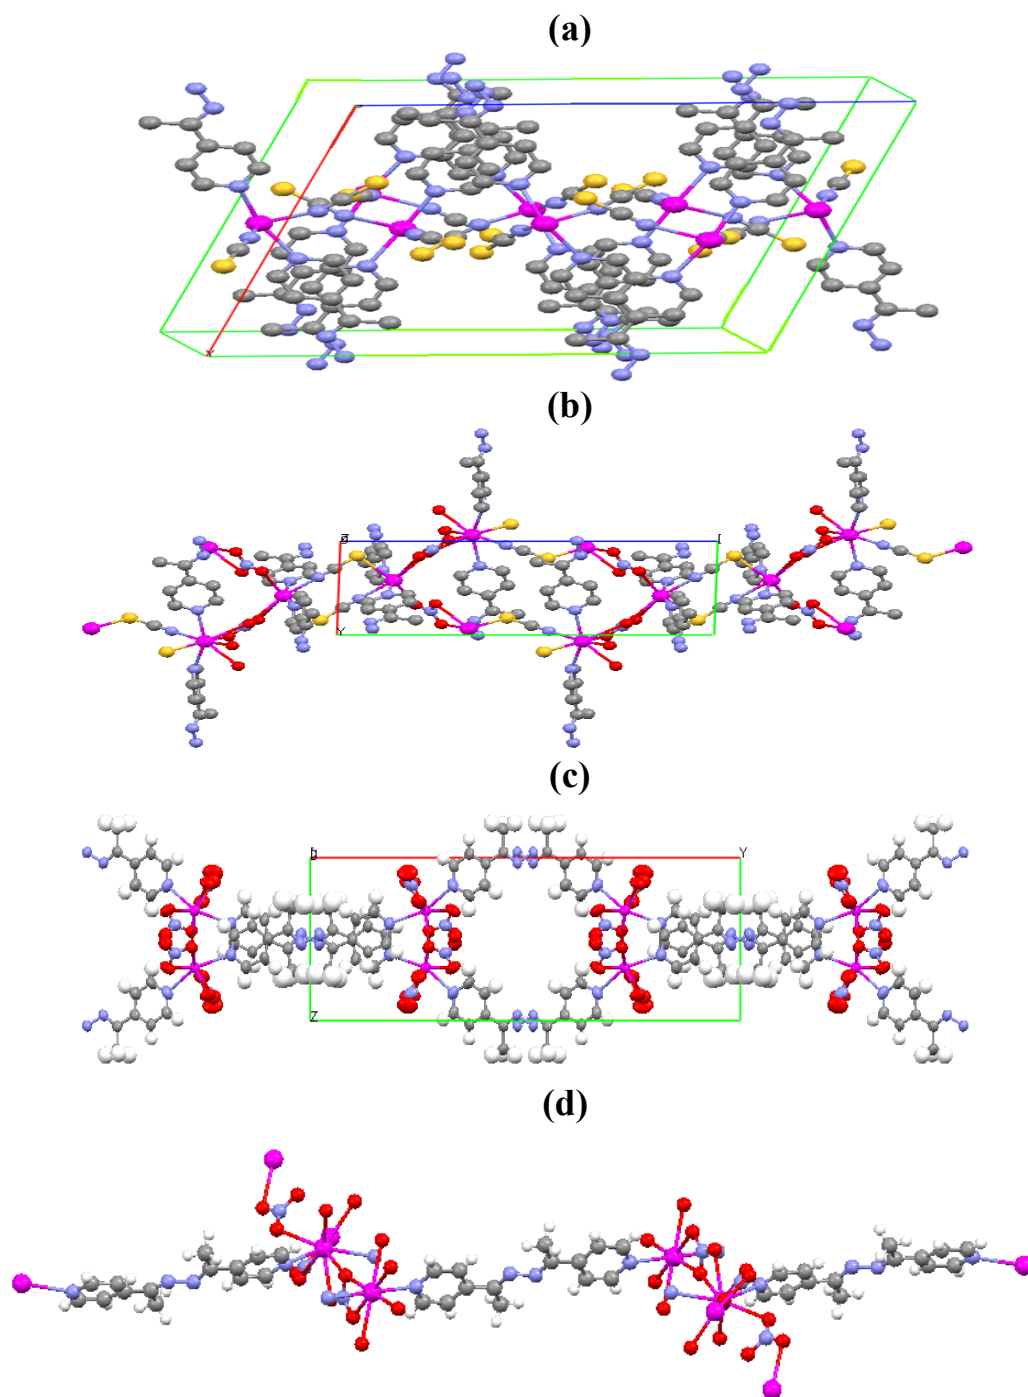

**Fig. S1** The coordination environments and unit cell of (a) compound  $[\text{Pb}(4\text{-bpdh})(\text{SCN})_2]_n$  (1) (b) compound  $[\text{Pb}(4\text{-bpdh})(\text{SCN})(\text{NO}_3)]_n$  (2) (c) compound  $[\text{Pb}(4\text{-bpdh})(\text{NO}_3)_2(\text{H}_2\text{O})]_n$  (3) and (d) compound  $[\text{Pb}(4\text{-bpdh})(\text{NO}_3)_2]_n$  (4) (Pb= violet, O = red, C = gray and N= blue S= orange and H= white).

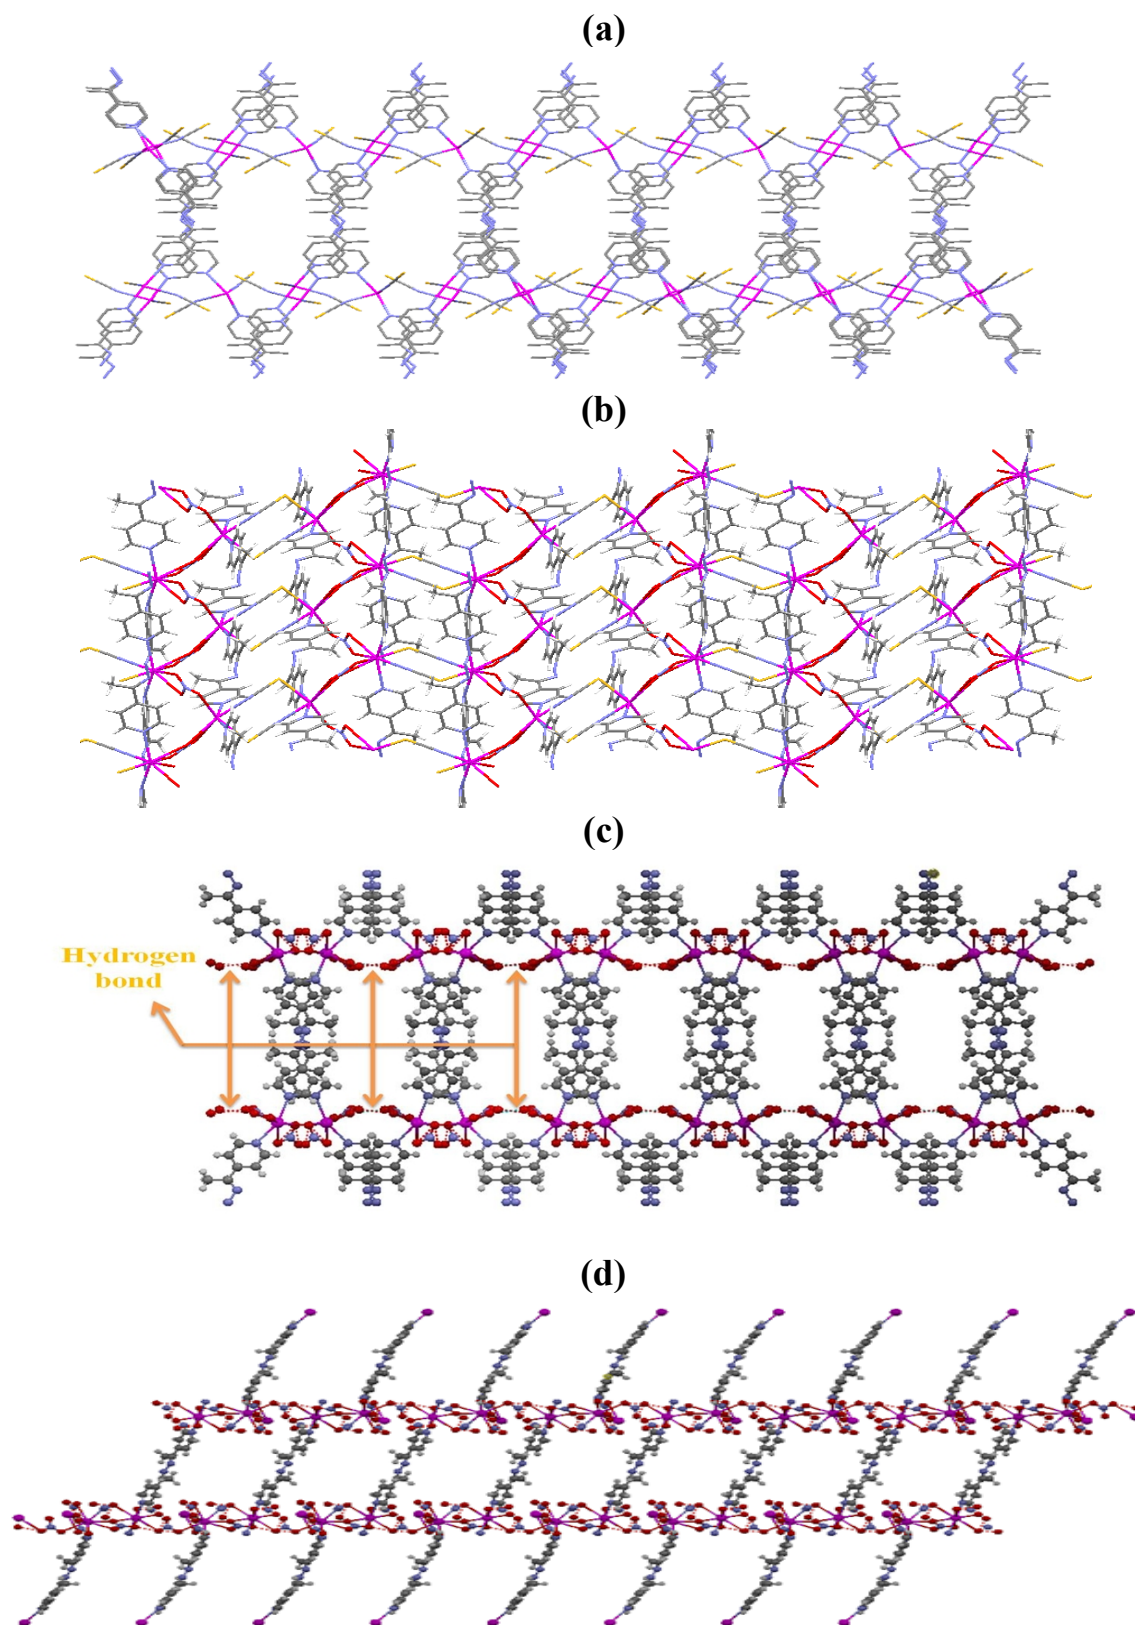

**Fig. S2** A schematic diagram illustrating the interactions in polymeric chains of (a) compound 1, (b) compound 2, (c) compound 3 and (d) compound 4 .

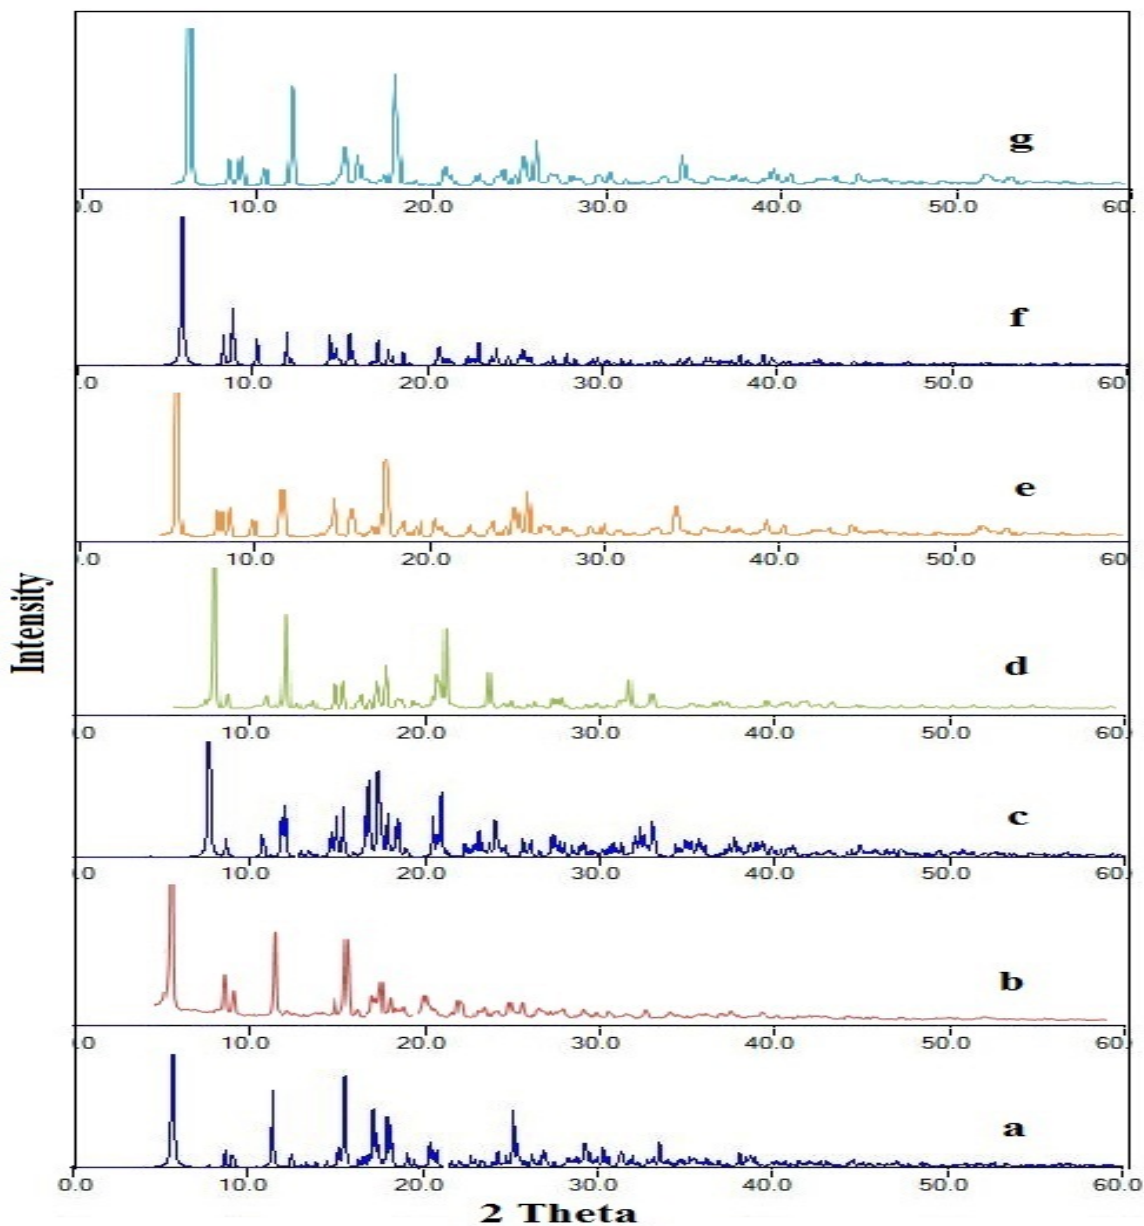

**Fig. S3** The XRD patterns of (a) simulated from single crystal X-ray data of compound **1**, (b) bulk materials as synthesized of compound **1**, (c) simulated from single crystal X-ray data of compound **2**, (d) bulk materials obtained by solid state anion-replacement of compound **1** with 1 mmol NaNO<sub>3</sub>, (e) bulk materials obtained by solid state anion-replacement of compound **2** with 1 mmol NaNO<sub>3</sub>, and (f) simulated from single crystal X-ray data of compound **3**, (g) compound **3** obtained by solid state anion-replacement of compound **1** with 2 mmol NaNO<sub>3</sub>.

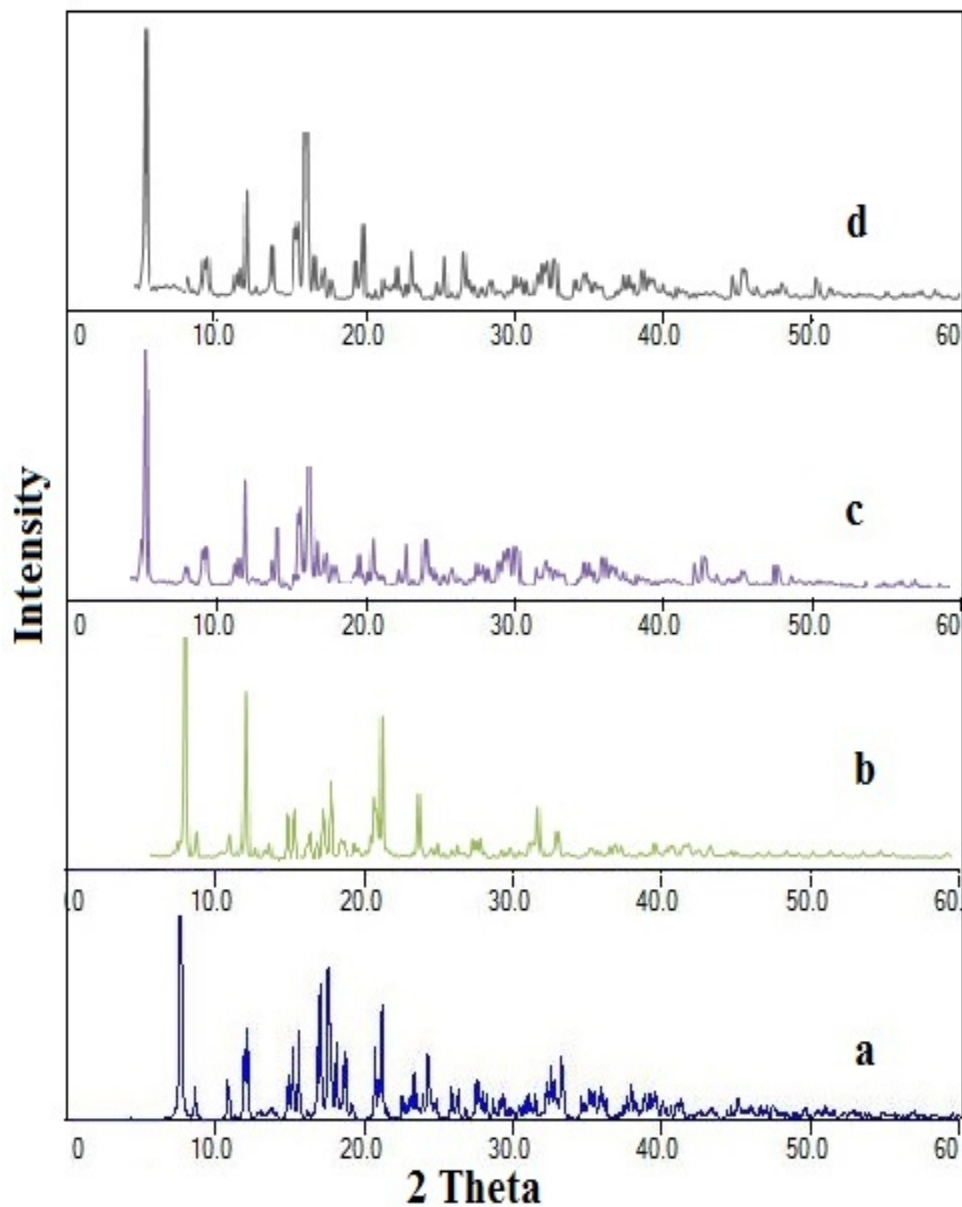

**Fig. S4** The XRD patterns of (a) simulated from single crystal X-ray data of compound **2**, (b) compound **2** that obtained by solid state anion-replacement of compound **3** with 1 mmol  $\text{NH}_4\text{SCN}$  (c) compound **1** obtained by solid state anion-replacement of compound **2** with 1 mmol  $\text{NH}_4\text{SCN}$ , (d) compound **1** obtained by solid state anion-replacement of compound **3** with 2 mmol  $\text{NH}_4\text{SCN}$ .

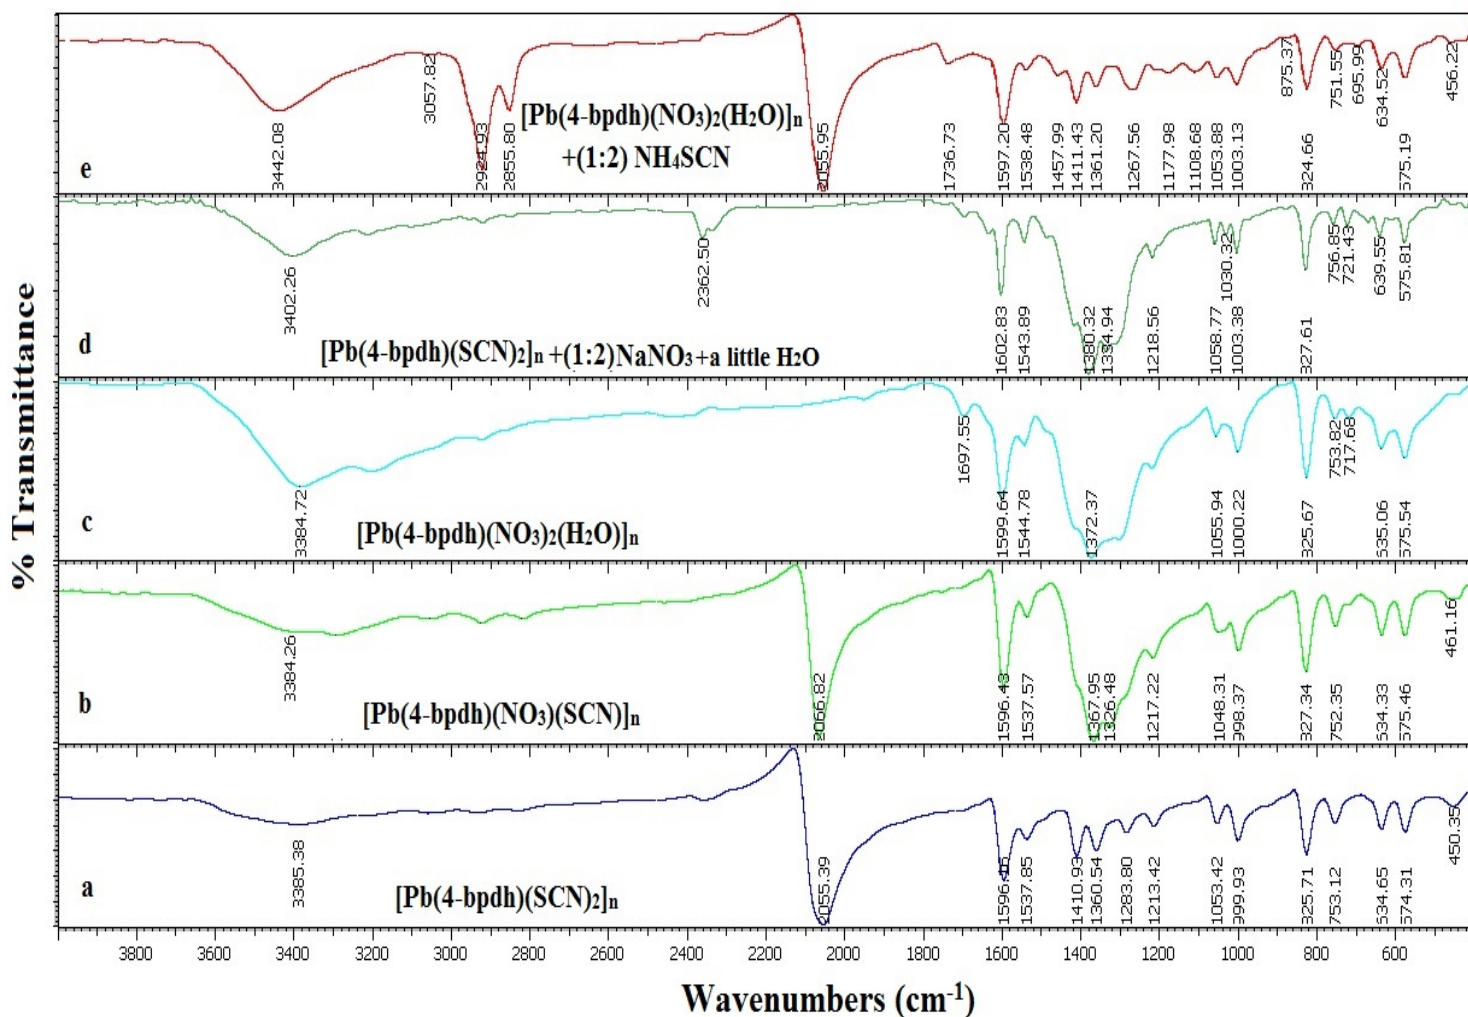

**Fig. S5** IR spectra of (a) compound  $[\text{Pb}(4\text{-bpdh})(\text{SCN})_2]_n$  (**1**), (b) bulk materials of compound  $[\text{Pb}(4\text{-bpdh})(\text{NO}_3)(\text{SCN})]_n$  (**2**) obtained by solid state anion-replacement of compound **1** by grinding with 1 mmol  $\text{NaNO}_3$ , (c) bulk materials of compound  $[\text{Pb}(4\text{-bpdh})(\text{NO}_3)_2(\text{H}_2\text{O})]_n$  (**3**) obtained by solid state anion-replacement of compound **2** by grinding with 1 mmol  $\text{NaNO}_3$ , (d) bulk materials obtained by solid state anion-replacement of compound **1** by grinding with 2 mmol  $\text{NaNO}_3$  and a little water, and (e) bulk materials obtained by solid state anion-replacement of compound **3** by grinding with 2 mmol  $\text{NH}_4\text{SCN}$ .

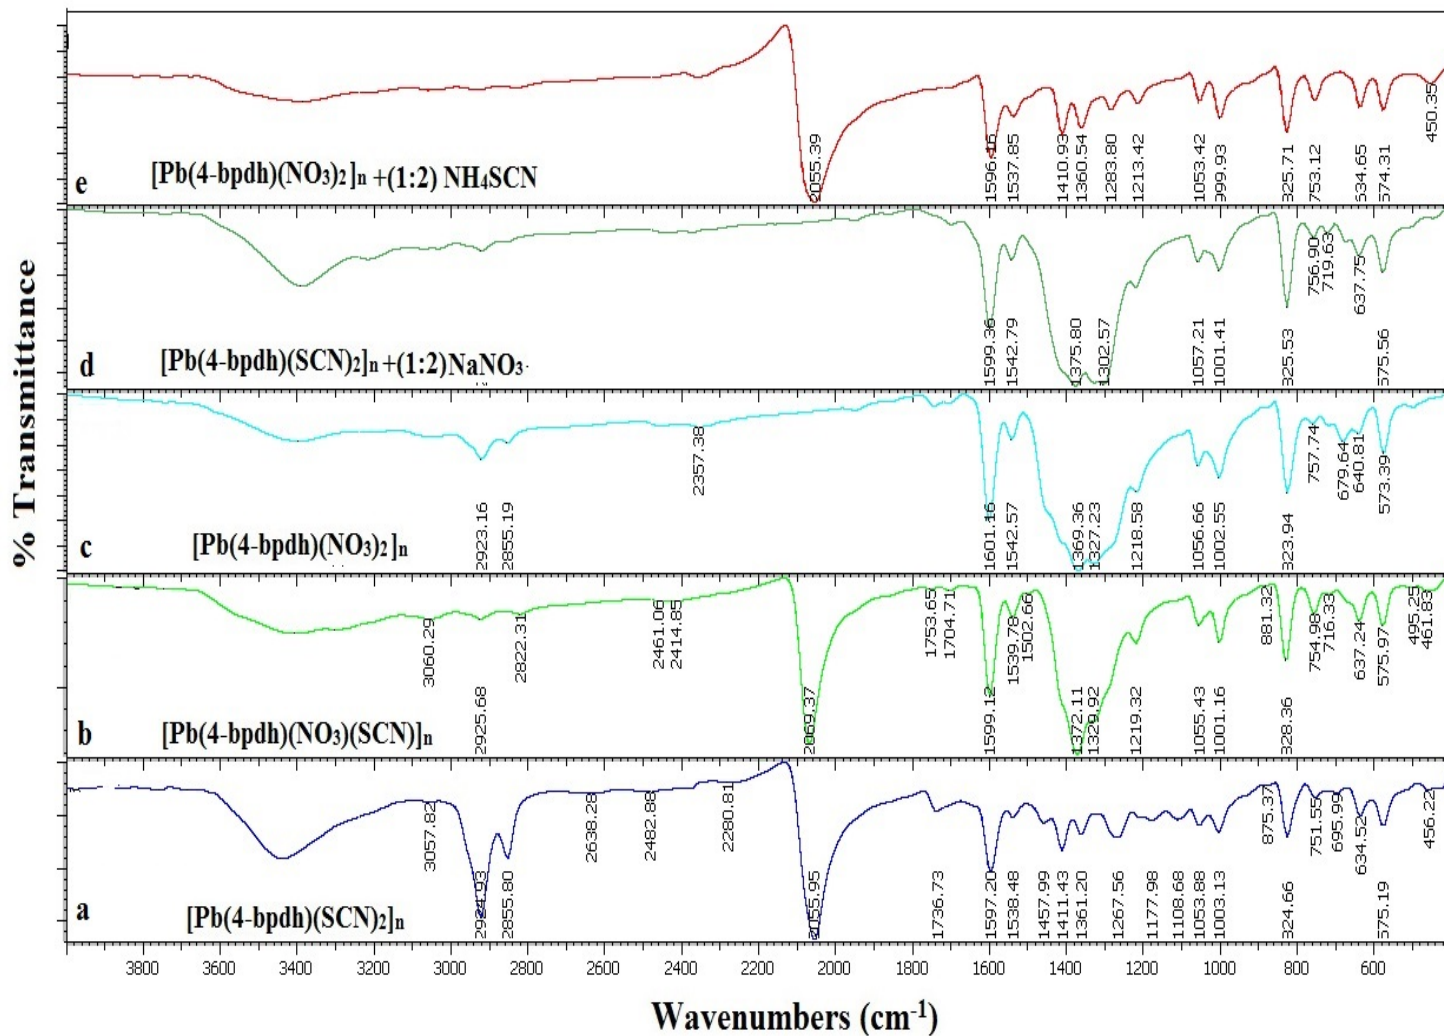

**Fig. S6** IR spectra of (a) compound [Pb(4-bpdh)(SCN)<sub>2</sub>]<sub>n</sub> (**1**), (b) bulk materials of compound [Pb(4-bpdh)(NO<sub>3</sub>)(SCN)]<sub>n</sub> (**2**) obtained by solid state anion-replacement of compound **1** by grinding with 1 mmol NaNO<sub>3</sub>, (c) bulk materials of compound [Pb(4-bpdh)(NO<sub>3</sub>)<sub>2</sub>]<sub>n</sub> (**3**) obtained by solid state anion-replacement of compound **2** by grinding with 1 mmol NaNO<sub>3</sub>, (d) bulk materials obtained by solid state anion-replacement of compound **1** by grinding with 2 mmol NaNO<sub>3</sub>, and (e) bulk materials obtained by solid state anion-replacement of compound **3** by grinding with 2 mmol NH<sub>4</sub>SCN.

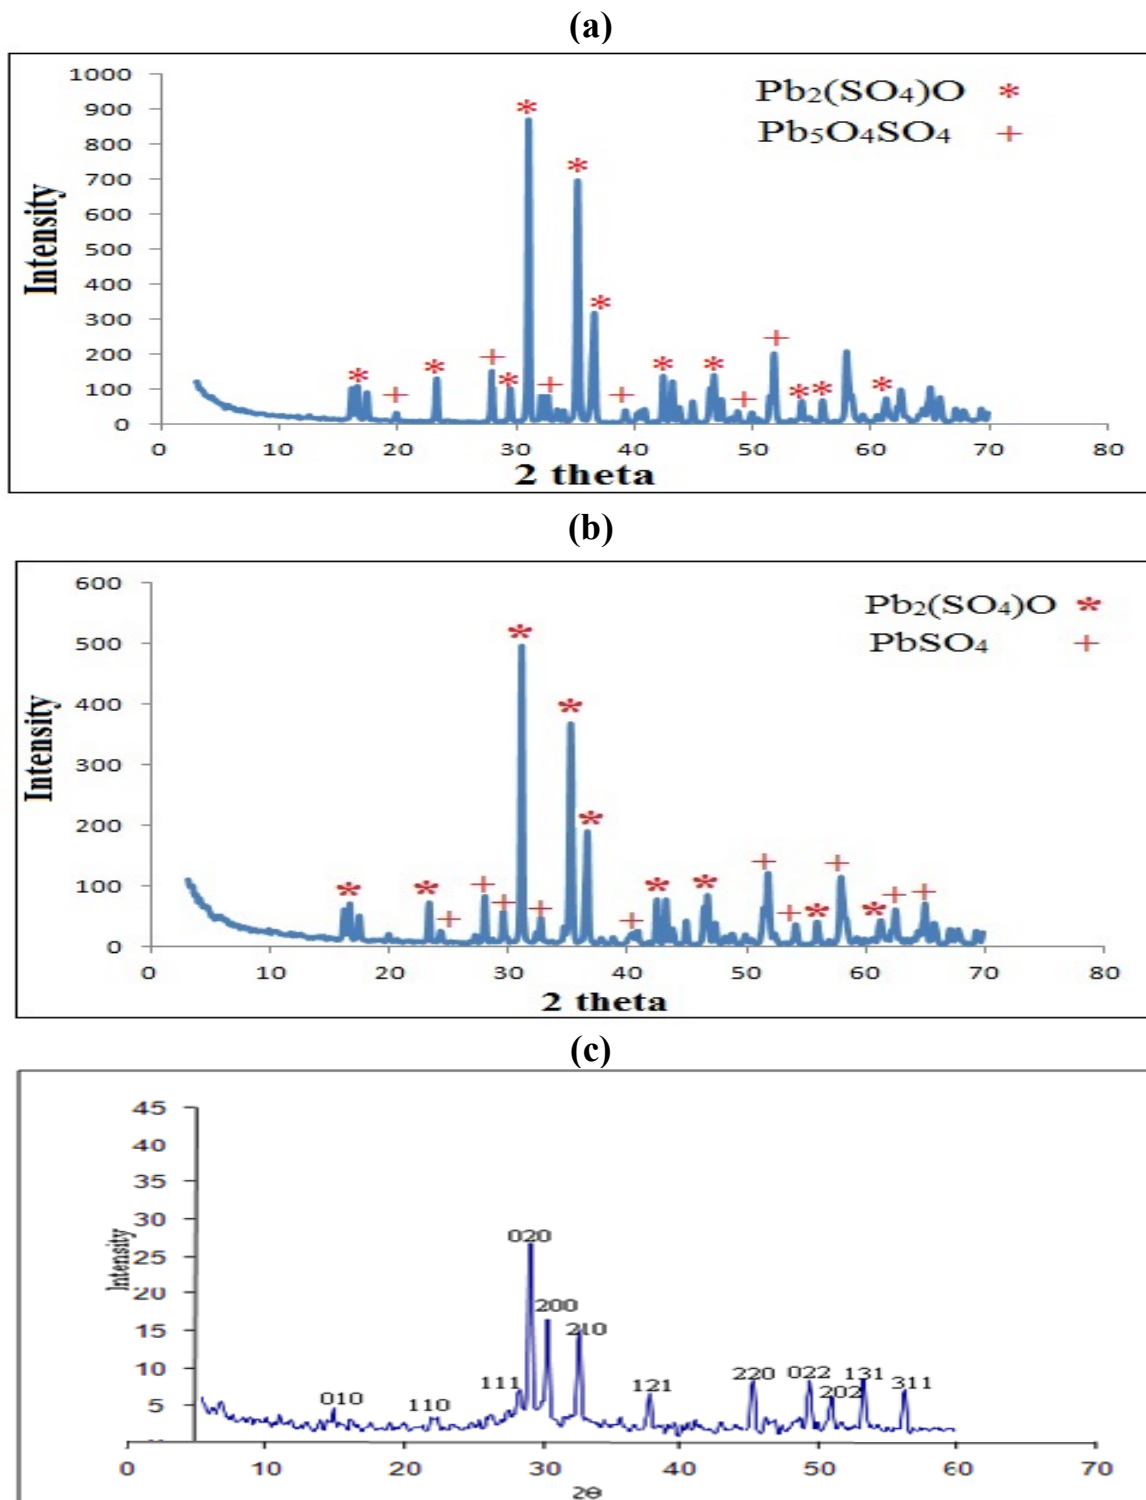

**Fig. S7** XRD patterns of (a)  $\text{Pb}_2(\text{SO}_4)\text{O}/\text{Pb}_5\text{O}_4\text{SO}_4$ , (b)  $\text{Pb}_2(\text{SO}_4)\text{O}/\text{PbSO}_4$  and (c)  $\text{PbO}$  nanoparticles prepared by thermal decomposition of compounds **1**, **2** and **3**, **4** at  $600\text{ }^\circ\text{C}$  under air atmosphere, respectively.
